# Supplementary material for: A Solid-State Pathway towards the Tunable Carboxylation of Cellulosic Fabrics: Controlling the Surface’s Acidity
Source: MDPI journal article supplement (doi:10.3390/membranes11070514), 2021-07-08
Supplement: s1 [file s1]

Supplementary Material

# A Solid-State Pathway towards the Tunable Carboxylation of Cellulosic Fabrics: Controlling the Surface's Acidity

Eugenio H. Otal <sup>1,\*</sup>, Manuela L. Kim <sup>1</sup>, Juan Hinestroza <sup>4</sup>, Mutsumi Kimura <sup>1,2,3\*</sup>

<sup>1</sup> Department of Chemistry and Materials, Faculty of Textile Science and Technology, Shinshu University, Ueda Campus, 386-8567, Japan.

<sup>2</sup> COI Aqua-Innovation Center, Shinshu University, Ueda Campus, 386-8567, Japan.

<sup>3</sup> Research Initiative for Supra-Materials, Shinshu University, Ueda Campus, 386-8567, Japan.

<sup>4</sup> Department of Fiber Science and Apparel Design, Cornell University, Ithaca, NY 14853, USA.

\* Correspondence: eugenio\_otal@shinshu-u.ac.jp, mkimura@shinshu-u.ac.jp

## 1. FTIR

### 1.1. Oxalic Acid

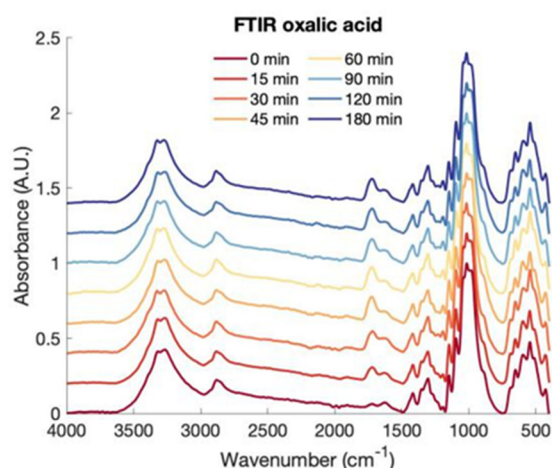

**Figure S1.** FTIR spectra of cotton samples treated with oxalic acid at different times.

### 1.2. Fumaric Acid

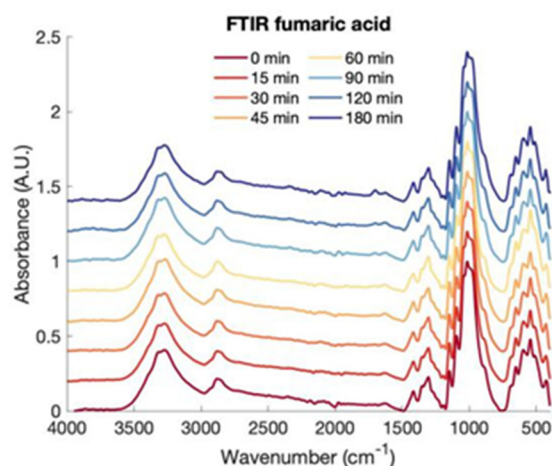

**Figure S2.** FTIR spectra of cotton samples treated with fumaric acid at different times.

### 1.3 Citric Acid

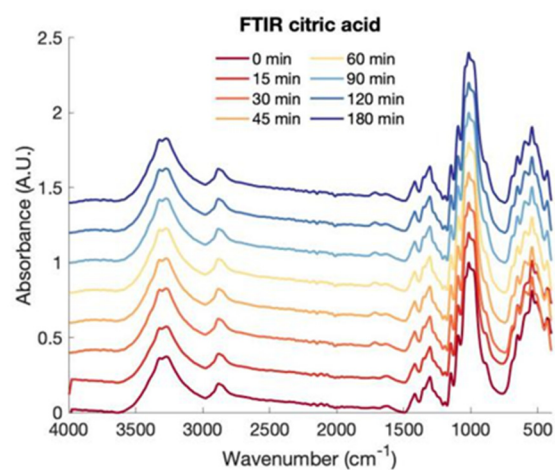

Figure S3. FTIR spectra of cotton samples treated with citric acid at different times.

## 2. Carboxyl Groups Titration

### 2.1. Time Optimization

Oxalic Acid—Total Carboxyl Content (TCC)

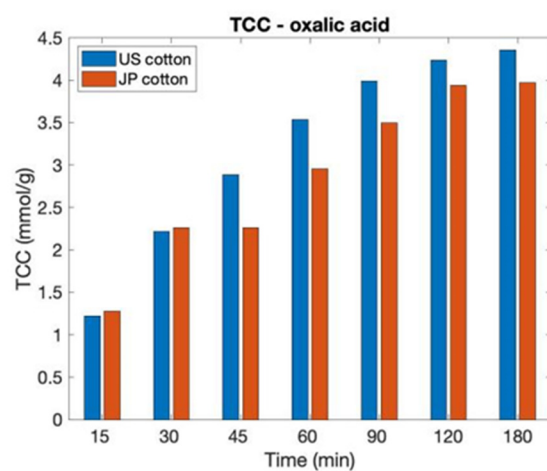

Figure S4. Total carboxyl group content of samples treated with oxalic acid at 110 °C as a function of time.

Free Carboxyl Content/Total Carboxyl Content Ratio

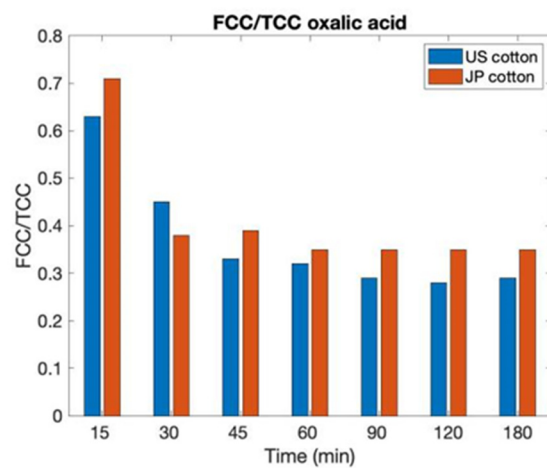

**Figure S5.** Free carboxyl content/total carboxyl content ratio of samples treated with oxalic acid at 110 °C as a function of time.

Degree of Substitution

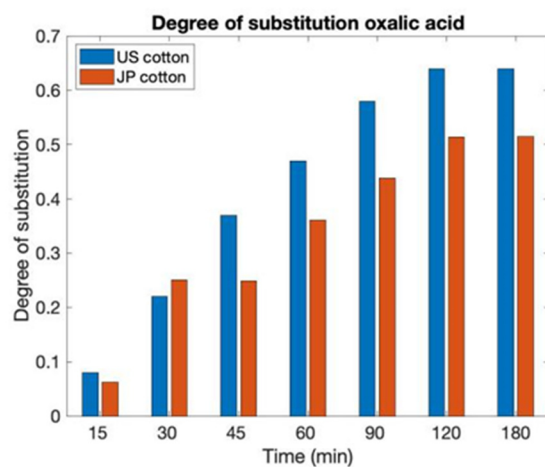

**Figure S6.** Degree of substitution of samples treated with oxalic acid at 110 °C as a function of time.

Fumaric Acid—Total Carboxyl Content (TCC)

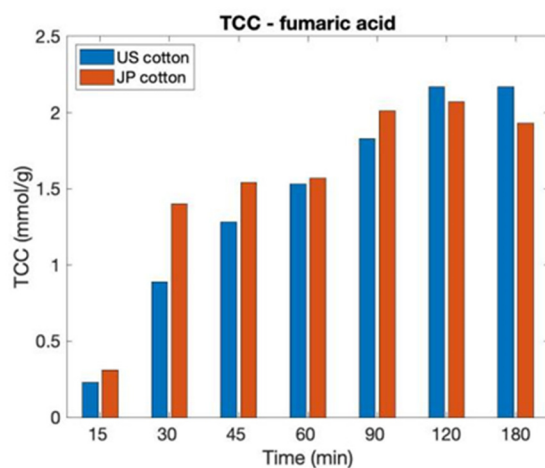

**Figure S7.** Total carboxyl group content of samples treated with fumaric acid at 110 °C as a function of time.

Free Carboxyl Content/Total Carboxyl Content Ratio

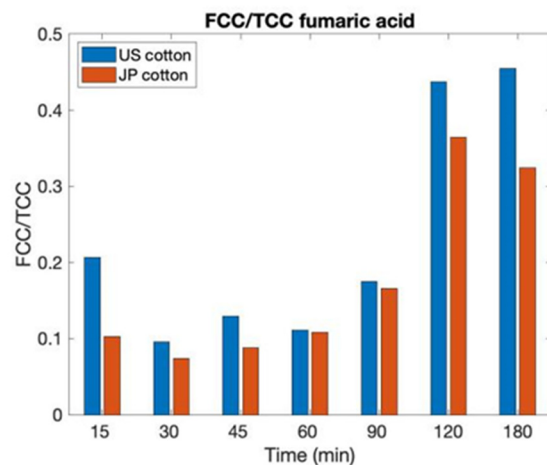

**Figure S8.** Free carboxyl content/total carboxyl content ratio of samples treated with fumaric acid at 110 °C as a function of time.

Degree of Substitution

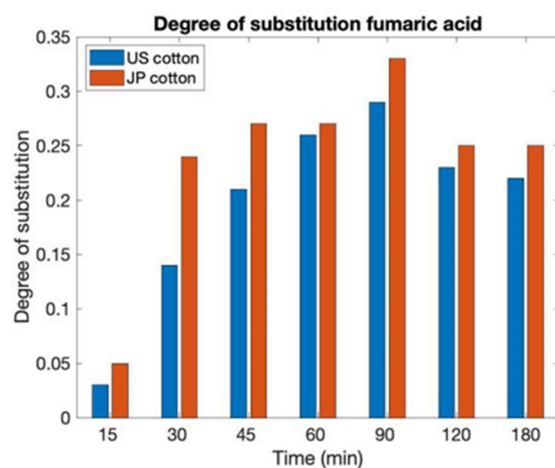

**Figure S9.** Degree of substitution of samples treated with fumaric acid at 110 °C as a function of time.

Citric Acid—Total Carboxyl Content (TCC)

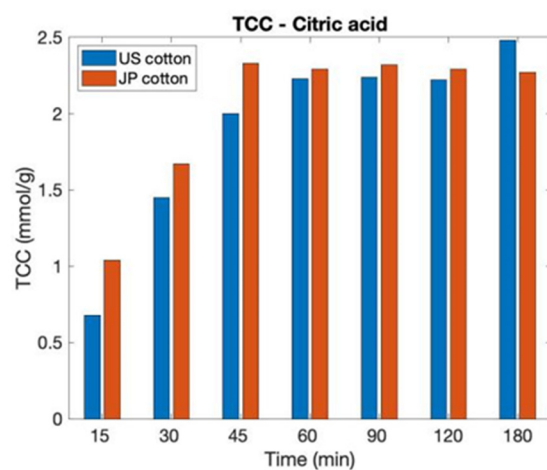

**Figure S10.** Total carboxyl group content of samples treated with citric acid at 110 °C as a function of time.

### Free Carboxyl Content/Total Carboxyl Content Ratio

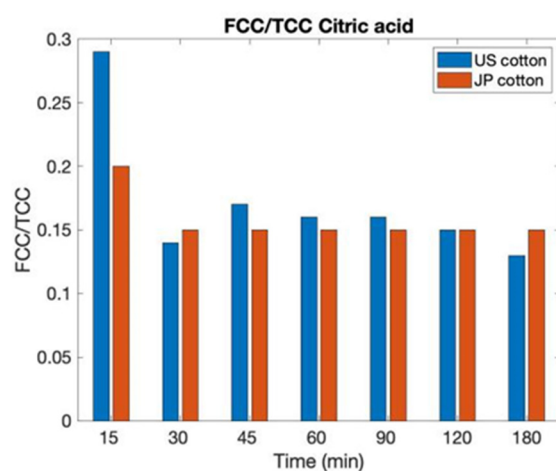

**Figure S11.** Free carboxyl content/total carboxyl content ratio of samples treated with citric acid at 110 °C as a function of time.

### Degree of Substitution

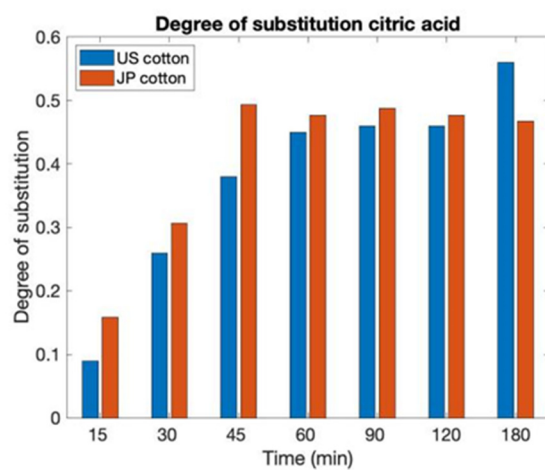

**Figure S12.** Degree of substitution of samples treated with citric acid at 110 °C as a function of time.

### 2.2. Temperature Optimization

#### Fumaric Acid—Total Carboxyl Content (TCC)

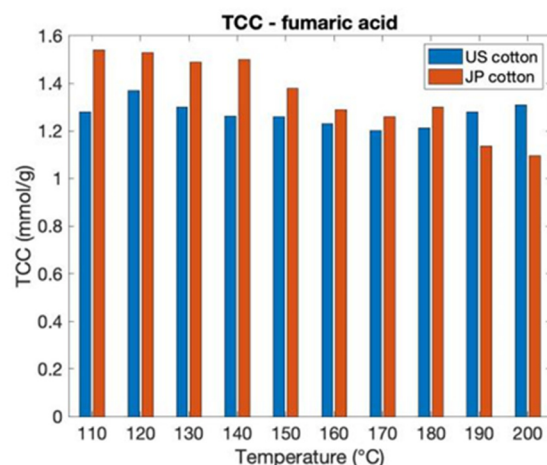

**Figure 13.** Total carboxyl group content of samples treated with fumaric acid for 45 min as a function of temperature.

Free Carboxyl Content/Total Carboxyl Content Ratio

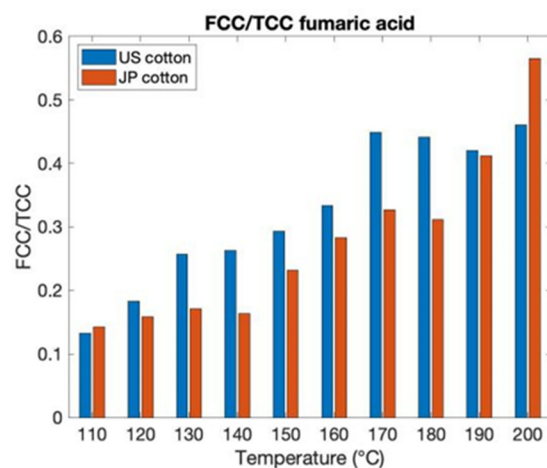

**Figure S14.** Free carboxyl content/total carboxyl content ratio of samples treated with fumaric acid for 45 min as a function of temperature.

Degree of Substitution

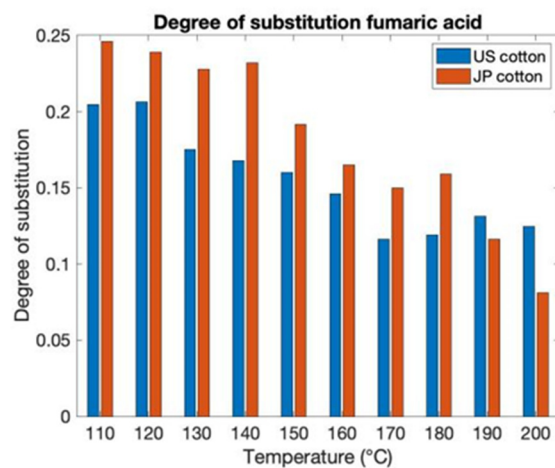

**Figure S15.** Degree of substitution of samples treated with fumaric acid for 45 min as a function of temperature.

### Citric Acid—Total Carboxyl Content (TCC)

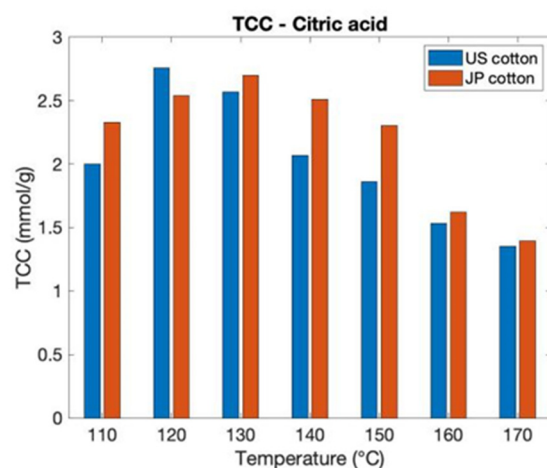

**Figure S16.** Total carboxyl group content of samples treated with citric acid for 45 min as a function of temperature.

### Free Carboxyl Content/Total Carboxyl Content Ratio

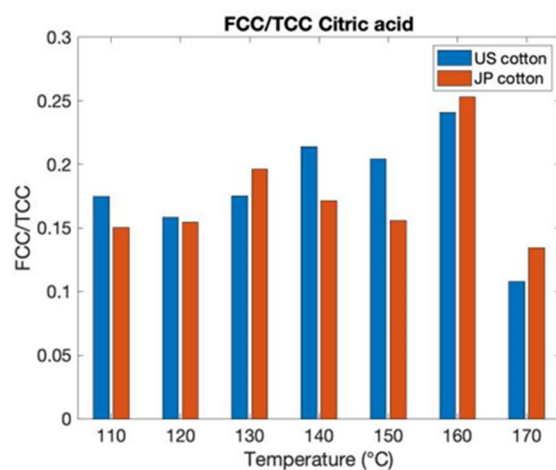

**Figure S17.** Free carboxyl content/total carboxyl content ratio of samples treated with citric acid for 45 min as a function of temperature.

### Degree of Substitution

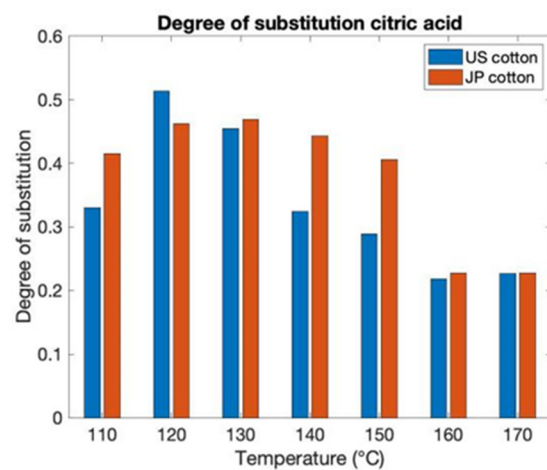

**Figure S18.** Degree of substitution of samples treated with citric acid for 45 min as a function of temperature.

### 1.3. Methylene Blue Adsorption Isotherms

Untreated Cotton

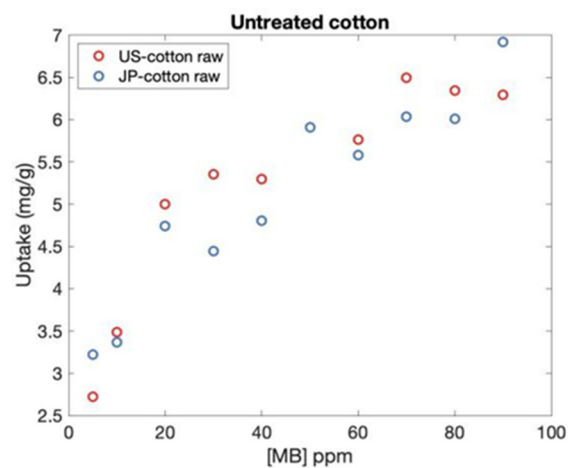

**Figure S19.** Methylene blue uptake isotherm on untreated cotton.

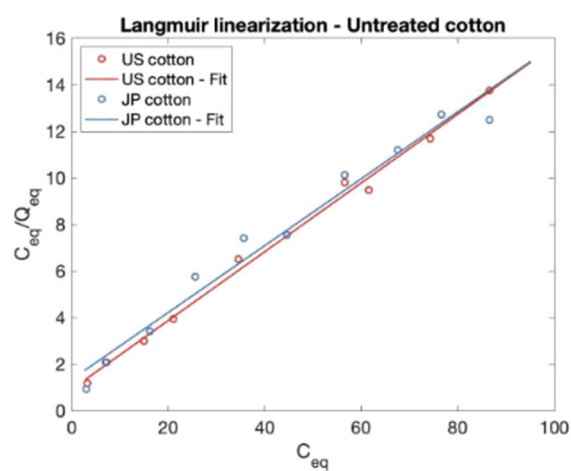

**Figure S20.** Langmuir linearization of the methylene blue uptake isotherm on untreated cotton.

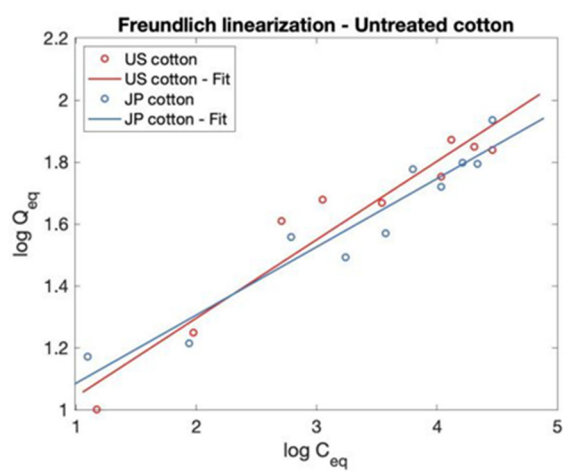

**Figure S21.** Freundlich linearization of the methylene blue uptake isotherm on untreated cotton.



## Oxalic Acid

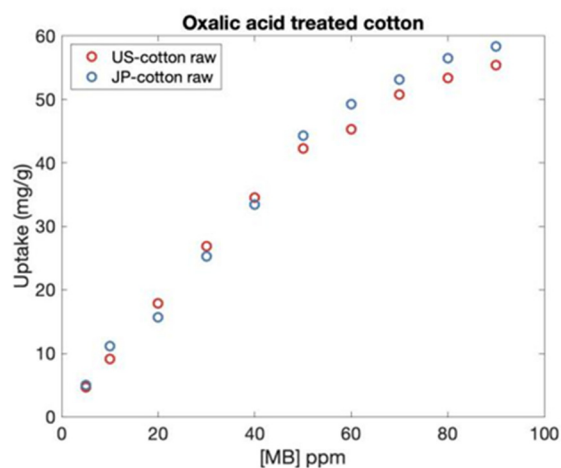

Figure 22. Methylene blue uptake isotherm on oxalic acid-modified cotton.

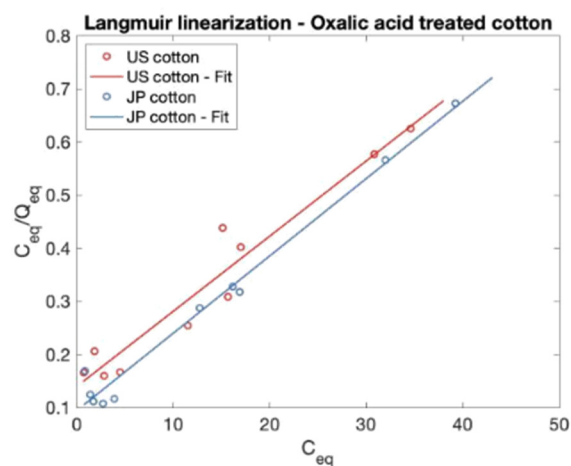

Figure S23. Langmuir linearization of the methylene blue uptake isotherm on oxalic acid-modified cotton.

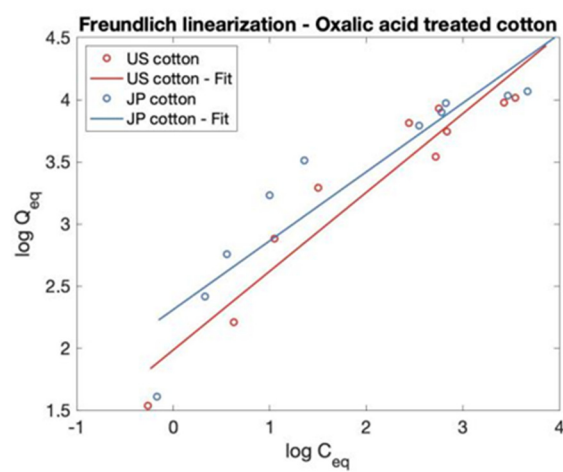

Figure S24. Freundlich linearization of the methylene blue uptake isotherm on oxalic acid-modified cotton.

## Fumaric Acid

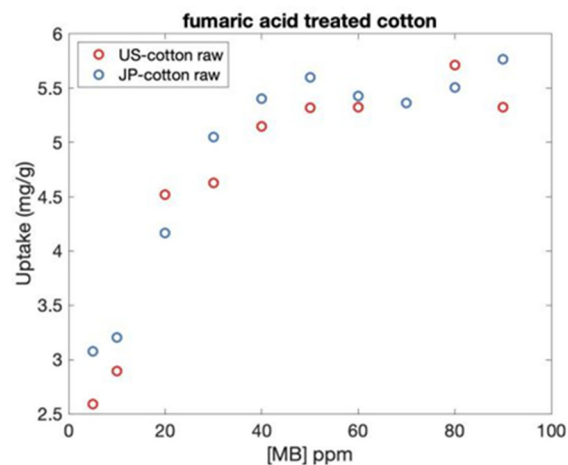

**Figure S25.** Methylene blue uptake isotherm on fumaric acid-modified cotton.

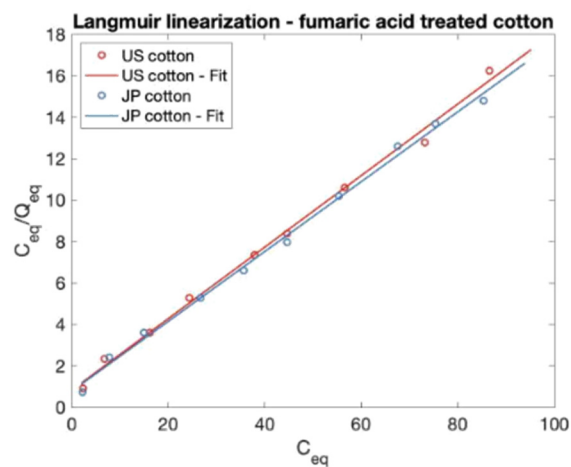

**Figure S26.** Langmuir linearization of the methylene blue uptake isotherm on fumaric acid-modified cotton.

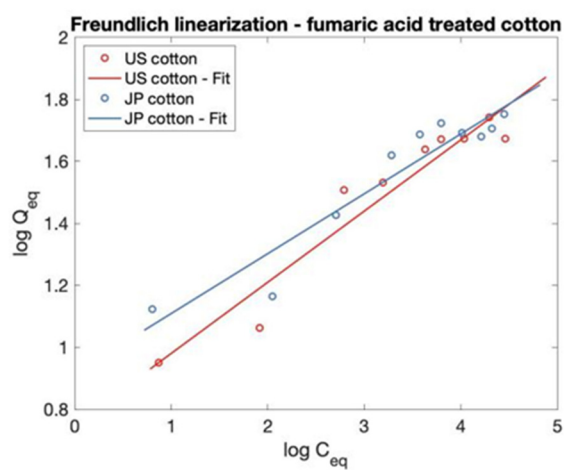

**Figure S27.** Freundlich linearization of the methylene blue uptake isotherm on fumaric acid-modified cotton.

Citric Acid

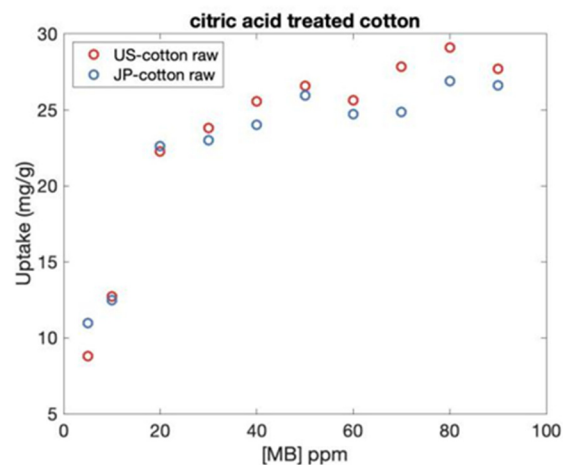

Figure S28. Methylene blue uptake isotherm on citric acid-modified cotton.

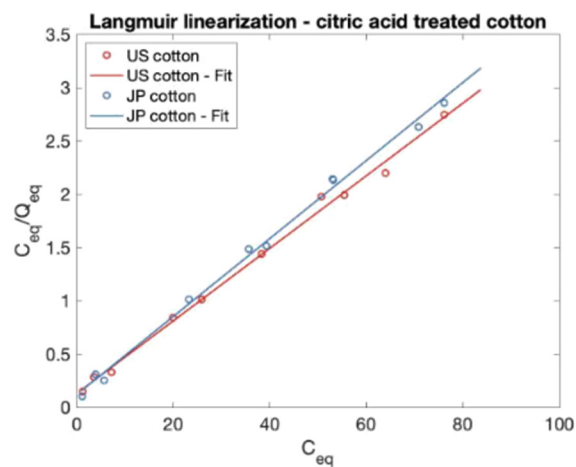

Figure S29. Langmuir linearization of the methylene blue uptake isotherm on citric acid-modified cotton.

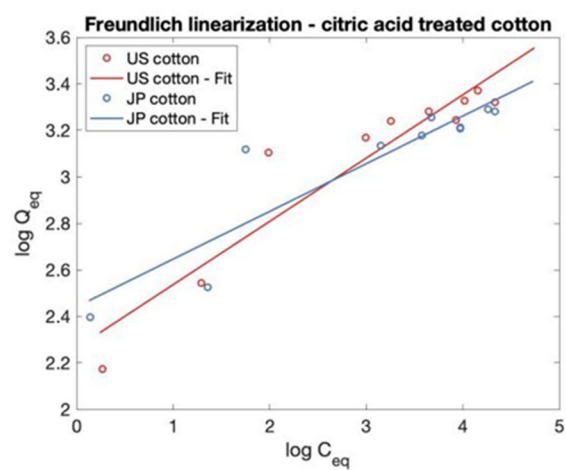

Figure S30. Freundlich linearization of the methylene blue uptake isotherm on citric acid-modified cotton.

#### 1.4. Methylene Blue Adsorption Kinetics

##### Oxalic Acid-Treated Cotton

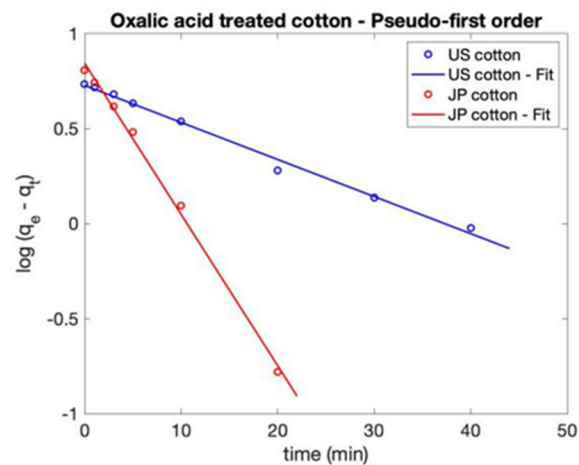

**Figure S31.** Methylene blue uptake pseudo first-order adsorption kinetics on oxalic acid-modified cotton.

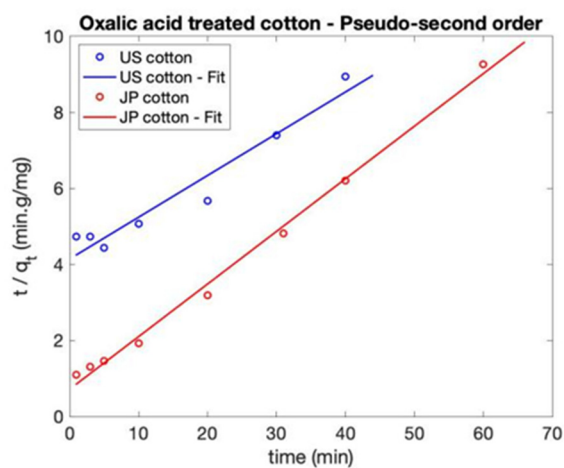

**Figure S32.** Methylene blue uptake pseudo second-order adsorption kinetics on oxalic acid-modified cotton.

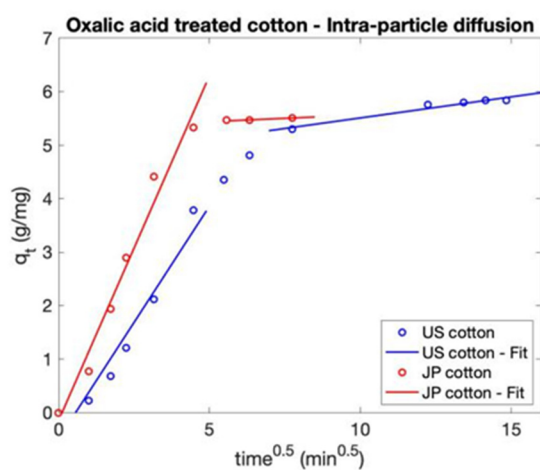

**Figure S33.** Methylene blue uptake intra-particle on oxalic acid-modified cotton.

Fumaric Acid-Treated Cotton

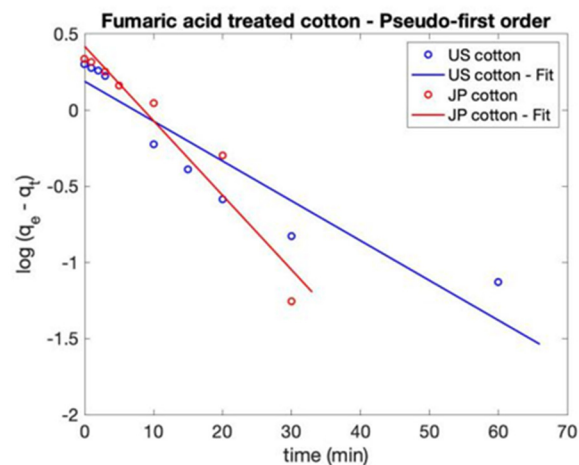

**Figure S34.** Methylene blue uptake pseudo first-order adsorption kinetics on fumaric acid-modified cotton.

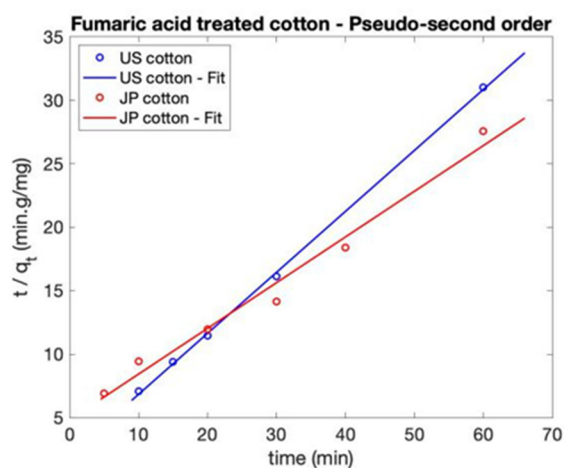

**Figure S35.** Methylene blue uptake pseudo second-order adsorption kinetics on fumaric acid-modified cotton.

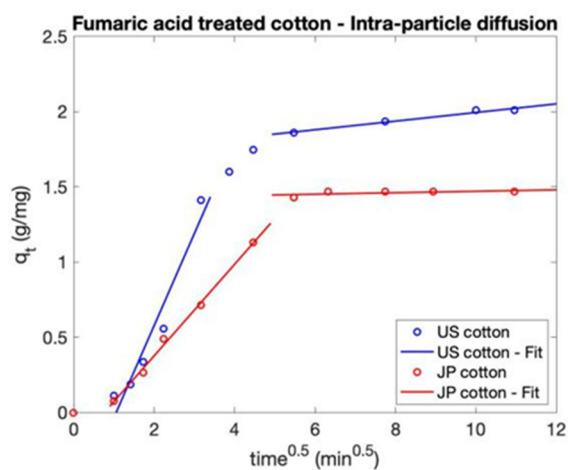

**Figure S36.** Methylene blue uptake intra-particle on fumaric acid-modified cotton.

Citric Acid-Treated Cotton

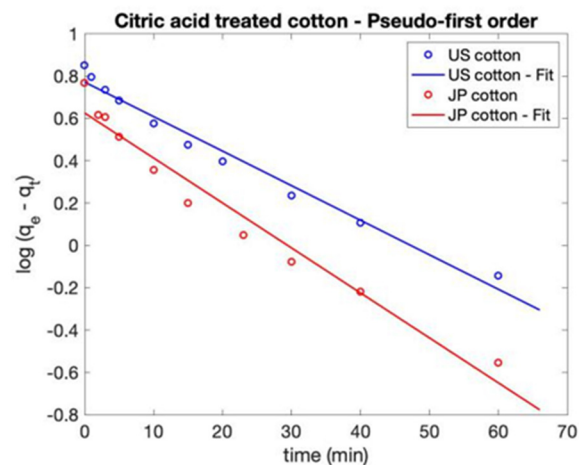

**Figure S37.** Methylene blue uptake pseudo first-order adsorption kinetics on citric acid-modified cotton.

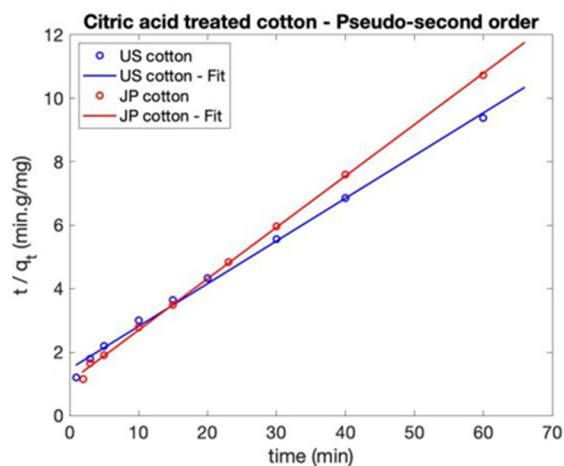

**Figure S38.** Methylene blue uptake pseudo second-order adsorption kinetics on citric acid-modified cotton.

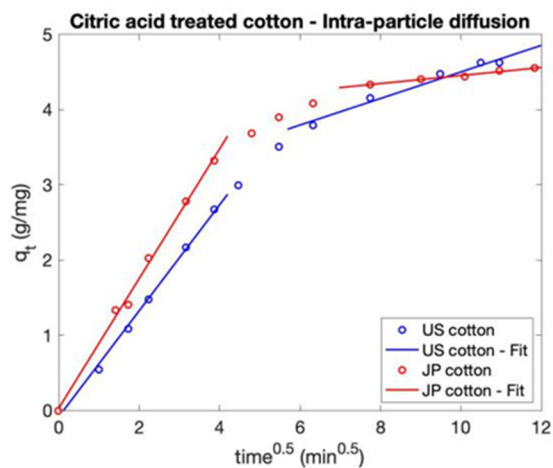

**Figure S39.** Methylene blue uptake intra-particle on citric acid-modified cotton.
